# Supplementary material for: Nitrogen-doped sp3carbon dot catalysed two-electron electrochemical oxygen reduction for efficient production of hydrogen peroxide
Source: Royal Society of Chemistry journal article supplement (doi:10.1039/d3ta01920a), 2023-01-01
Supplement: d3ta01920a1.pdf [file d3ta01920a1.pdf]

## Electronic Supplementary Information

### **Nitrogen-doped $sp^3$ carbon dots catalyse two-electron electrochemical oxygen reduction for efficient production of hydrogen peroxide**

*Jianhua Shen, Xinyue Qiu, Yihua Zhu\**

Key Laboratory for Ultrafine Materials of Ministry of Education, Shanghai Engineering Research Center of Hierarchical Nanomaterials, Frontiers Science Center for Materiobiology and Dynamic Chemistry, School of Materials Science and Engineering, East China University of Science & Technology, Shanghai 200237, China

E-mails: Yihua Zhu (yhzhu@ecust.edu.cn)

## S1. Experimental Parameters Information

### Electrochemical measurements

For the three-electrode system used for electrochemical testing, the working electrode consisted of a glassy carbon disk electrode and a platinum ring electrode (glassy carbon disk electrode outer diameter: 5.61 mm, platinum ring outer diameter: 7.92 mm, platinum ring inner diameter: 6.25 mm). Ag/AgCl electrode and platinum wire electrode were used as reference electrode and counter electrode, respectively. 2 mg catalyst was added to 500  $\mu\text{L}$  deionized water, 475  $\mu\text{L}$  ethanol, and 25  $\mu\text{L}$  0.5 wt.% Nafion solution and ultrasonically dispersed for 30 min to obtain a homogeneous catalyst ink. The experimental pretreatment step of the working electrode was to polish the surface of the glassy carbon electrode using  $\text{Al}_2\text{O}_3$  powder of different particle sizes in combination with ultrasonic surface cleaning. Afterwards, 10  $\mu\text{L}$  of ink was added to the surface of the glassy carbon disk electrode and air dried. The catalyst loading was about 80  $\mu\text{g cm}^{-2}$ .

Subsequently, electrochemical tests were performed under a range of conditions.

The catalysts were activated by cyclic voltammetry (CV) until the CV curve was completely stabilized before formal testing.

The linear sweep voltammetry (LSV) curve was tested at a potential interval of 0-1 V vs. RHE with a constant voltage of 1.2 V vs. RHE applied continuously to the ring electrode. To correct the polarization curve, the background current measured in the  $\text{N}_2$ -saturated electrolyte was subtracted.

All electrochemical measurements were conducted in 0.1 M  $\text{N}_2/\text{O}_2$  saturated KOH solution (pH=13), and the reversible hydrogen electrode (RHE) was used as the reference for all potentials in this work. They were calculated by equation (S-1).

$$E_{\text{RHE}} = E_{\text{Ag/AgCl}} + 0.197 + 0.0591 \cdot \text{pH} \quad (\text{S-1})$$

The hydrogen peroxide selectivity ( $\text{H}_2\text{O}_2\%$ ) and the number of transferred electrons ( $n$ ) of DCDs were quantitatively characterized by the formula (S-2) - (S-3):

$$\text{H}_2\text{O}_2(\%) = 200 \times \frac{\frac{I_r}{N}}{I_d + \frac{I_r}{N}} \quad (\text{S-2})$$

$$n = \frac{4 I_d}{I_d + \frac{I_r}{N}} \quad (\text{S-3})$$

Where, separately,  $I_d$  and  $I_r$  stand for disk and ring currents.  $N$  represents RRDE's current collection efficiency, which is calibrated to 0.37.

The corresponding electrochemical active surface area (ECSA) can be calculated from formula (S-4):

$$ECSA = \frac{C_{dl}}{A \times C_s} \quad (S-4)$$

Where  $A$  is the catalyst loading on the surface of the disk electrode, and  $C_s = 40$  mF cm<sup>-2</sup>, which is the empirical constant for the capacitance value per unit area.

### Characterizations

Using an X-ray diffraction spectrometer (XRD), model Rigaku D/MAX 2550, with a scanning range of 10-90° and a sweep speed of 4° min<sup>-1</sup>, the material phase structure of the materials was analysed. The surface morphology of the material was investigated by transmission electron microscopy (TEM). The instrument of choice was a Talos F200X field emission transmission electron microscope with a 200 kV operating voltage. Raman spectroscopy was used to analyse the carbon material for defect information and  $sp^2/sp^3$  conformation. A Renishaw Inquiry Reflex device was utilized, with wave number settings of 500-3500 cm<sup>-1</sup> and an excitation wavelength of 325 nm. Fourier transform infrared (FTIR) spectroscopy with a Thermo Fisher Nicolet iS50 equipment was used to examine the surface functional groups of the materials. Thermo Fisher ESCALAB 250Xi was utilized to conduct the X-ray photoelectron spectroscopy (XPS) analysis of surface chemistry. All data were charge adjusted using a C 1s peak at 284.8 eV.

### Cerium sulphate titration method

By Cerium sulphate titration method, the concentration of H<sub>2</sub>O<sub>2</sub> generated by the oxygen reduction reaction catalysed by N-DCDs under CA testing was determined. The equation of Ce(SO<sub>4</sub>)<sub>2</sub> reacting with H<sub>2</sub>O<sub>2</sub> in aqueous solution is as follows:

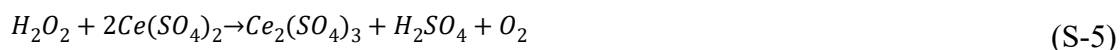

When H<sub>2</sub>O<sub>2</sub> is added, the yellow Ce<sup>4+</sup> solution becomes a transparent Ce<sup>3+</sup> solution. The concentration of H<sub>2</sub>O<sub>2</sub> in the electrolyte can be determined by analysing the absorbance at 317 nm using UV-vis spectroscopy, which is to measure the concentration of Ce<sup>4+</sup>. The 0.1 mol L<sup>-1</sup> standard cerium sulphate solution was diluted to a concentration gradient of 0.1 - 0.5 mM Ce(SO<sub>4</sub>)<sub>2</sub> solution and measured using UV-vis absorption spectroscopy.

Subsequently, an appropriate amount (50  $\mu\text{L}$ ) of the electrolyte solution replaced every hour of the chronoamperometry test was extracted and added to 3 mL of 0.4 mmol  $\text{L}^{-1}$  cerium sulphate solution, mixed well and then subjected to UV-vis test. The  $\text{H}_2\text{O}_2$  yield can be assessed from this.

The Faraday efficiency of  $\text{H}_2\text{O}_2$  is calculated as follows:

$$\text{Faradaic Efficiency (\%)} = \frac{2 CFV}{Q} \quad (\text{S-6})$$

In the formula, C is the actual concentration of  $\text{H}_2\text{O}_2$  ( $\text{mol L}^{-1}$ ), F is the Faraday constant ( $96485 \text{ C mol}^{-1}$ ), V is the volume (L), and Q is the number of transferred charges (C) obtained by integrating the I-t curve.

### Computational Details

All the DFT calculations were conducted using the Dmol3 module of Materials Studios 2017. The electronic exchange and related energy were treated using the Perdew, Burke and Ernzerhof (PBE) functional within the generalized gradient approximation (GGA). The conductor like screening model (COSMO) method was adopted to consider the electrostatic interaction of adsorbate and water solvent. The DFT semi-core pseudo potentials (DSPPs) core treatment with the relativistic effects were implemented to consider the core-electron ( $e^-$ ) interaction, which superseded core  $e^-$  by a single valid electric potential to simplify the calculations. The numerical basis set of double numerical plus polarization (DNP) was utilized. Thermal smearing of orbital occupation is set to 0.005 Ha (1 Ha = 27.21 eV). A  $3 \times 3 \times 1$  Monkhorst-Pack grid of special k-points was used for Brillouin zone integration. The SCF density convergence tolerance was  $1 \times 10^{-5}$  Ha. The maximum force, displacement, and energy of geometry optimal convergence tolerance are 0.004 Ha/ $\text{\AA}$ , 0.005  $\text{\AA}$ , and  $2 \times 10^{-5}$  Ha. The standard hydrogen electrode (SHE) model was calculated the Gibbs free energy change ( $\Delta G$ ) for each basic step. Based on this method, the  $\Delta G$  value can be determined as follows:

$$\Delta G = \Delta E + \Delta \text{ZPE} - T\Delta S + \int C_p dT \quad (\text{S-7})$$

where  $\Delta E$  is the electronic energy difference calculated from DFT,  $\Delta \text{ZPE}$  is the change in zero-point energies, T is the ambient temperature,  $C_p$  is the heat capacity and  $\Delta S$  is

the entropy change. The thermodynamic properties of gas-phase molecules and ZPE contribution of adsorbed species are obtained through vibrational frequencies. The computational hydrogen electrode (CHE) model was utilized to specify the Gibbs free energy of the proton-electron pair as the function of electrical potential.

Free energy is calculated as:

$$F = E + \mu_e * n_e \quad (\text{S-8})$$

Where  $E$  is the total energy of the system,  $\mu$  denotes the chemical potential of electrons at a given potential, and  $n_e$  represents the net charge of the system at  $U_{\text{RHE}} = 0.7 \text{ V}$ .

The DCD (111) and (110) surfaces were modelled by periodically repeated four-layer slabs with  $(3 \times 3)$  unit cells. The Brillouin zone was sampled with the Monkhorst-Pack scheme and  $3 \times 3 \times 1$  k-point mesh. The atoms in the top one layer was fully relaxed, while the rest of the atoms were fixed in their equilibrium positions. One vacuum slab of  $20 \text{ \AA}$  was added in the  $z$  direction to avoid periodic interactions.

## S2. Figures and tables

**Table S1.** Elemental contents obtained by XPS.

| Samples | C content /at. % | O content /at. % | N content /at. % |
|---------|------------------|------------------|------------------|
| DCDs    | 63.24            | 36.76            | /                |
| N-DCDs  | 76.38            | 18.73            | 4.89             |

**Table S2.** Functional group contents obtained by XPS C 1s.

| Samples | $sp^3$ content /at. % | $sp^2$ content /at. % | C-O/C-N<br>content /at. % | C=O<br>content /at. % |
|---------|-----------------------|-----------------------|---------------------------|-----------------------|
| DCDs    | 56.07                 | 20.40                 | 21.70                     | 1.83                  |
| N-DCDs  | 69.56                 | 3.61                  | 15.35                     | 11.48                 |

**Table S3.** Functional group contents obtained by XPS O 1s.

| Samples | C-O<br>content /at. % | C=O<br>content /at. % | N-O<br>content /at. % |
|---------|-----------------------|-----------------------|-----------------------|
| DCDs    | 94.37                 | 5.63                  | /                     |
| N-DCDs  | 55.63                 | 39.51                 | 4.86                  |

**Table S4.** Functional group contents obtained by XPS N 1s.

| Sample | N- <i>sp</i> <sup>3</sup> C<br>content /at. % | N- <i>sp</i> <sup>2</sup> C<br>content /at. % | N-O<br>content /at. % |
|--------|-----------------------------------------------|-----------------------------------------------|-----------------------|
| N-DCDs | 51.13                                         | 27.40                                         | 21.47                 |

**Table S5.** H<sub>2</sub>O<sub>2</sub> selectivity compared with previous works in 0.1M KOH electrolyte.

| Catalysts      | Onset<br>Potential<br>(V vs.<br>RHE) | H <sub>2</sub> O <sub>2</sub><br>Selectivity<br>(%) | Productivity                                                       | Faradaic<br>Efficiency<br>(%) | Ref.                                                                              | Ref.<br>Number |
|----------------|--------------------------------------|-----------------------------------------------------|--------------------------------------------------------------------|-------------------------------|-----------------------------------------------------------------------------------|----------------|
| N-DCDs         | 0.72                                 | 99.0                                                | 613.58 mmol<br>g <sub>Catalyst</sub> <sup>-1</sup> h <sup>-1</sup> | 90.4                          | <b>This work.</b>                                                                 | /              |
| B-C            | 0.77                                 | 85.0                                                | 7.36 mmol h <sup>-1</sup><br>cm <sup>-2</sup>                      | 87                            | <i>Nat. Commun.</i> ,<br>2021, <b>12</b> , 4225.                                  | Ref. 7         |
| CB+CTAB        | 0.80                                 | 95.2                                                | /                                                                  | /                             | <i>Chem</i> , 2020, <b>6</b> ,<br>1443-1458.                                      | Ref. 15        |
| HCNFs          | 0.75                                 | 97.3                                                | 6.37 mmol L <sup>-1</sup><br>h <sup>-1</sup>                       | /                             | <i>Angew. Chem., Int.</i><br><i>Ed. Engl.</i> , 2021,<br><b>60</b> , 10583-10587. | Ref. 16        |
| O-CNTs         | 0.80                                 | 90.0                                                | /                                                                  | /                             | <i>Nat. Catal.</i> , 2018,<br><b>1</b> , 156-162.                                 | Ref. 42        |
| N-CBMC-<br>500 | 0.74                                 | 95.9                                                | 2.11 mol<br>g <sub>Catalyst</sub> <sup>-1</sup> h <sup>-1</sup>    | 69.3                          | <i>J. Mater. Chem. A</i> ,<br>2022, <b>10</b> , 4749-<br>4757.                    | Ref. 35        |

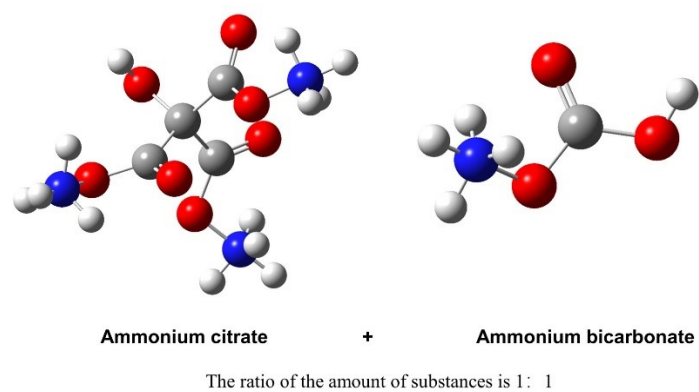

**Fig. S1** Precursor formulation structure and preparation scheme for N-DCDs.

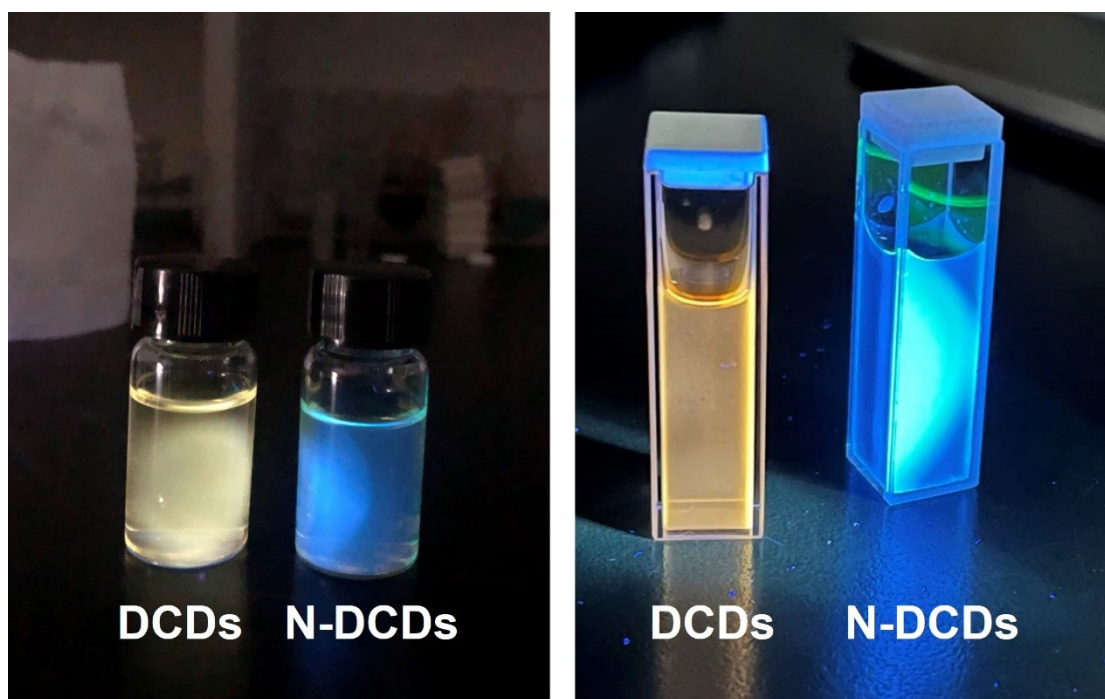

**Fig. S2** Aqueous solutions of DCDs samples emit fluorescence in different wavelengths.

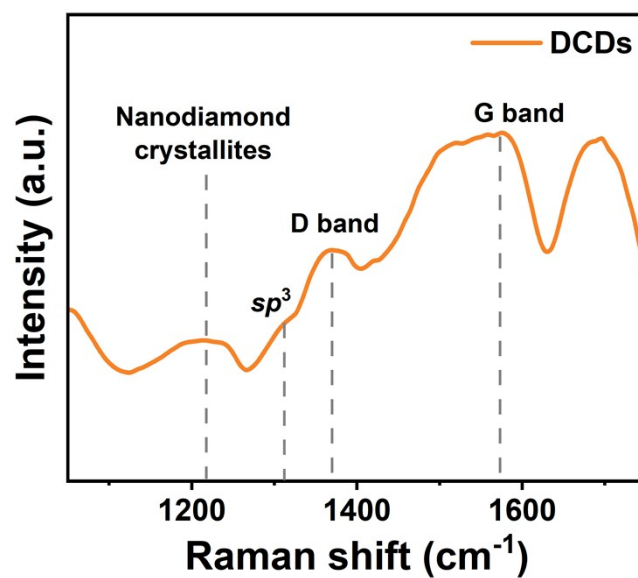

**Fig. S3** Raman spectrum of DCDs.

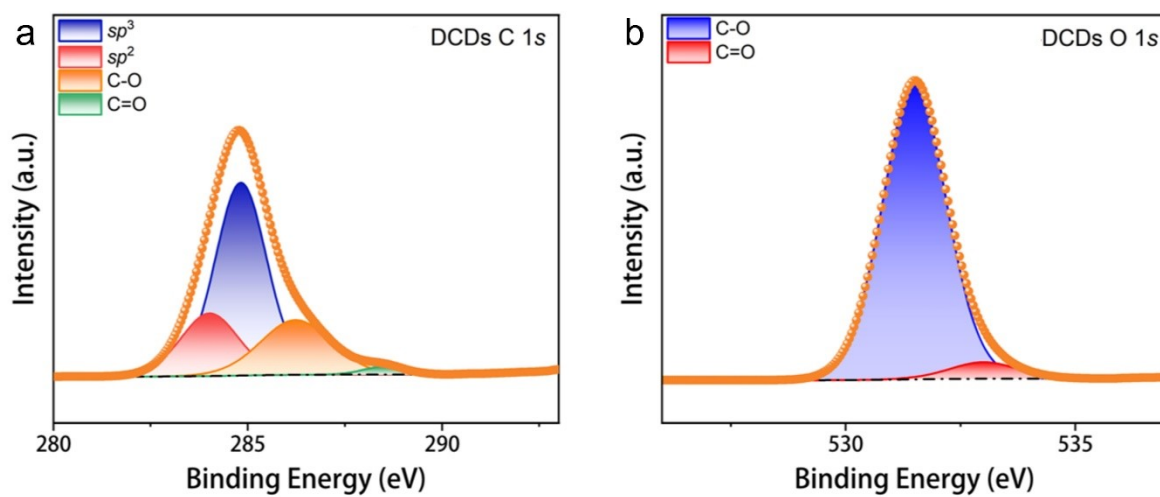

**Fig. S4** High-resolution XPS spectra of (a) C 1s and (b) O 1s of DCDs.

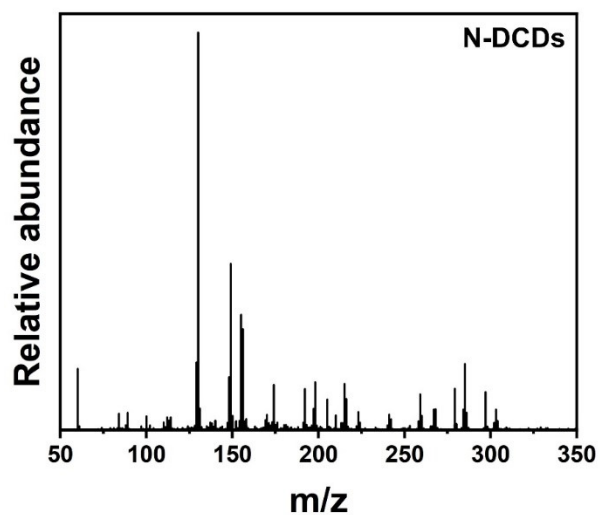

**Fig. S5** Mass spectrum of N-DCDs.

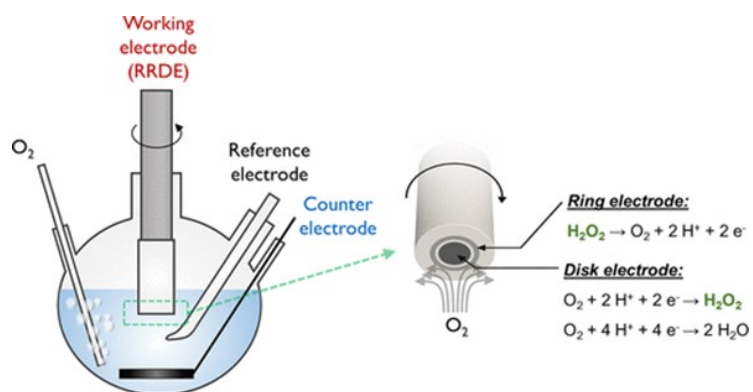

**Fig. S6** RRDE device schematic. (Ref. 45)

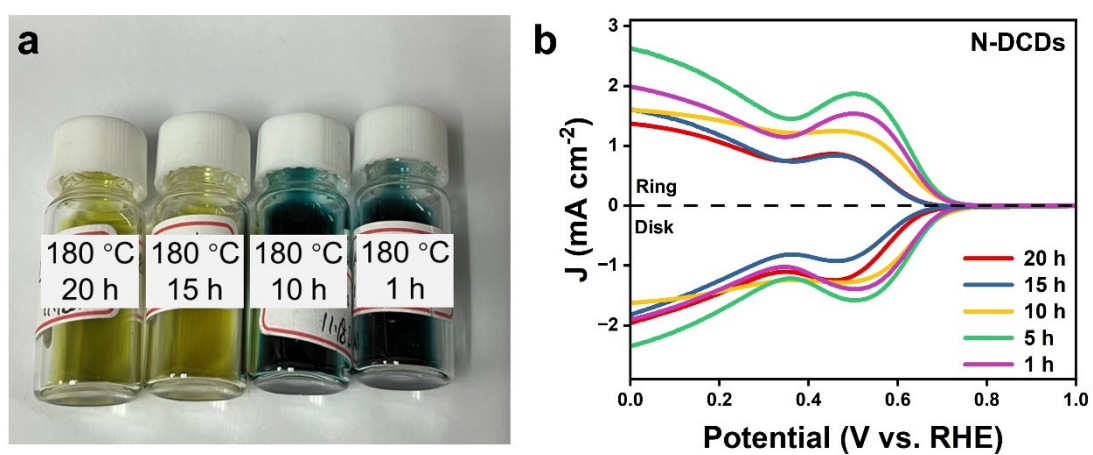

**Fig. S7** (a) Sample colors and (b) LSV curves of several N-DCDs prepared at different hydrothermal times at constant temperature.

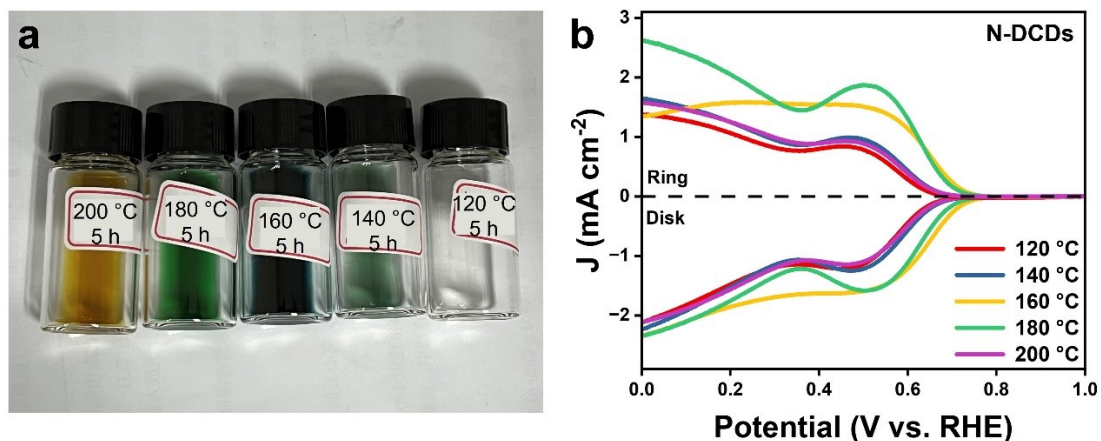

**Fig. S8** (a) Sample colors and (b) LSV curves of several N-DCDs prepared at different hydrothermal temperatures at constant time.

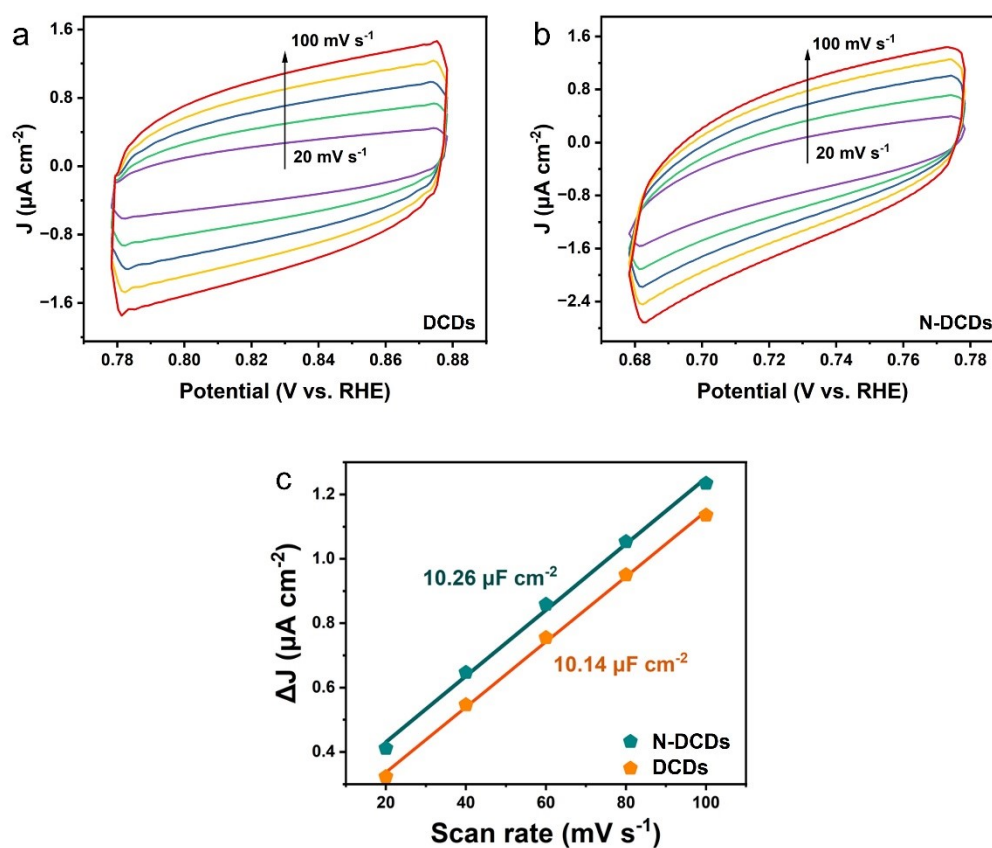

**Fig. S9** CV curves of (a) DCDs and (b) N-DCDs at different scanning rates acquired in  $N_2$ -saturated 0.1 M KOH solution, which were used to calculate  $C_{dl}$  and ESCA; (c) Electrochemical double-layer capacitances ( $C_{dl}$ ) fitted from the CV curves at different scanning rates.

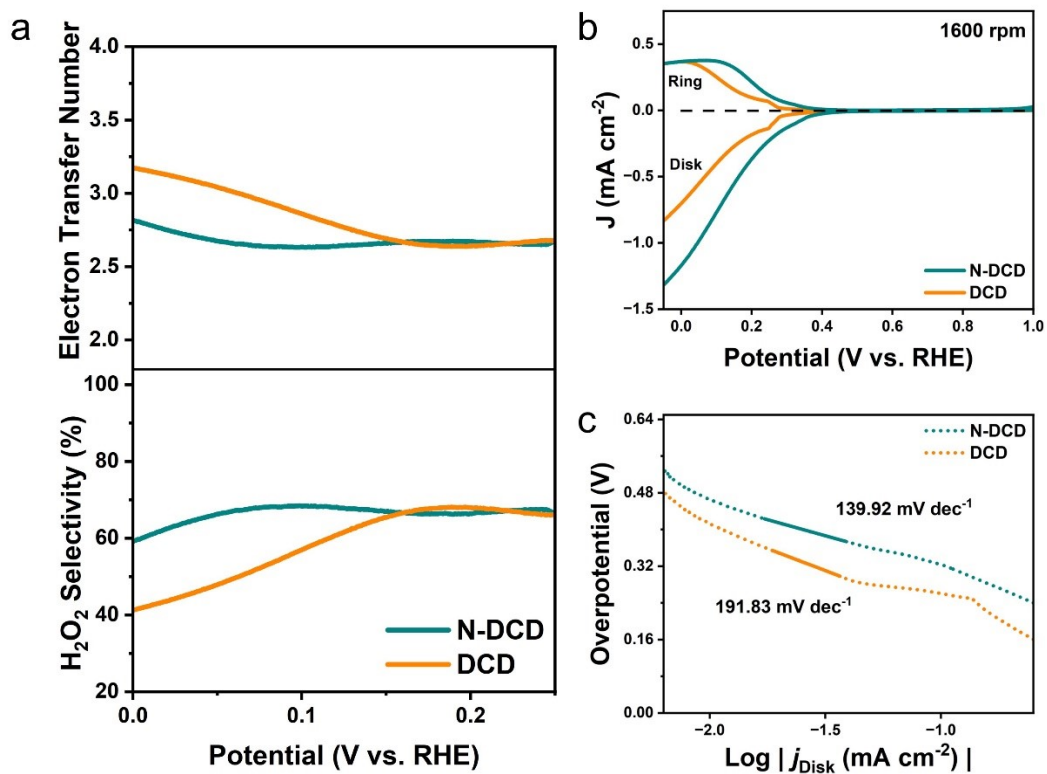

**Fig. S10** In  $O_2$ -saturated 0.1 M  $Na_2SO_4$  electrolyte: (a)  $H_2O_2$  selectivity and electron transfer number derived from polarization curves, (b) RRDE polarization curves obtained at 1600 rpm, (c) Tafel slope derived from disc current density.

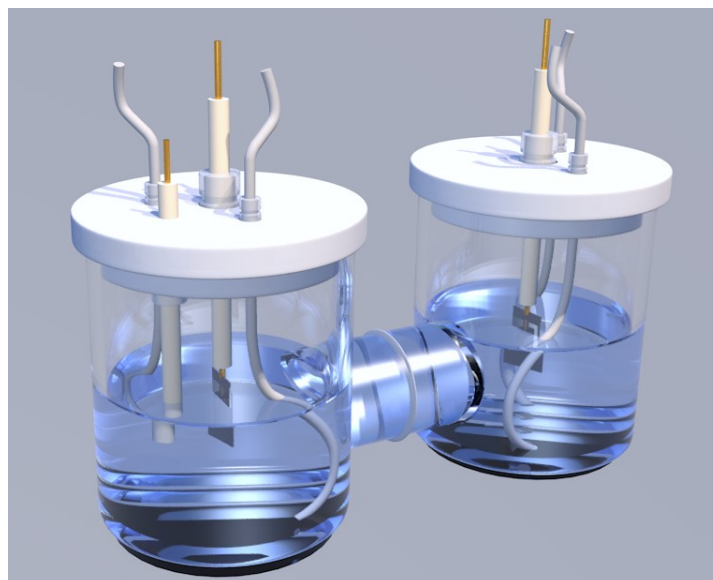

**Fig. S11** Assembled H-type electrolytic cell model.

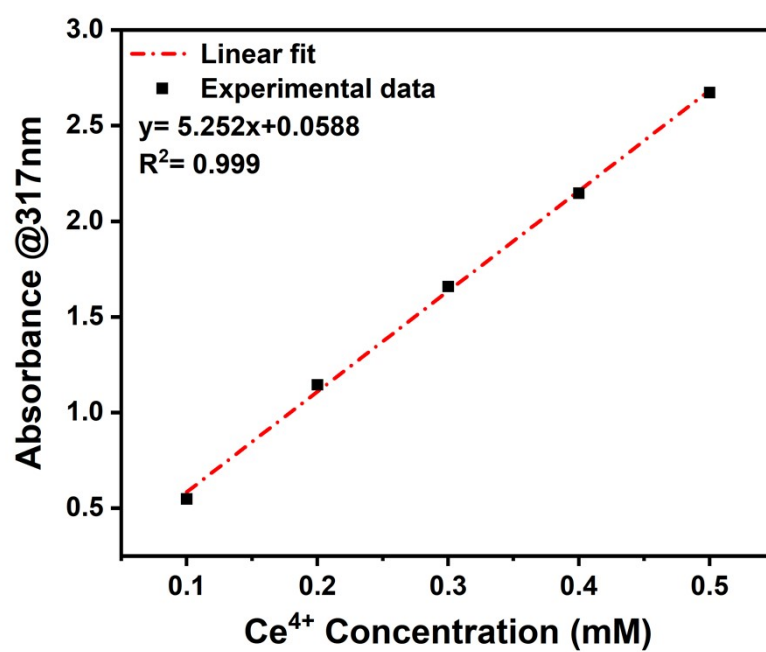

**Fig. S12** The standard concentration curve of  $\text{Ce}(\text{SO}_4)_2$  solution.

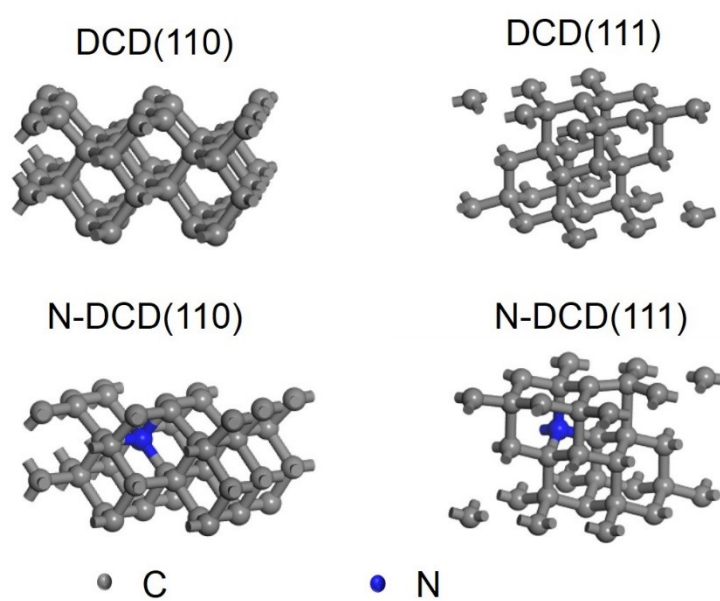

**Fig. S13** Computational models of DCD (110), DCD (111), N-DCD (110), and N-DCD (111).

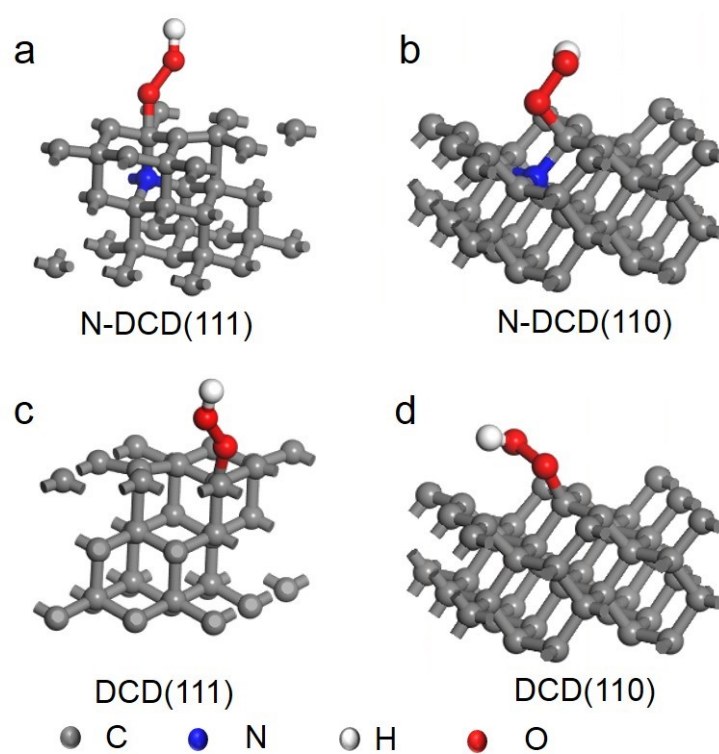

**Fig. S14** Computational models of (a) N-DCD(111), (b) N-DCD(110), (c) DCD(111), and (d) DCD(110); where the blue atoms represent the doped nitrogen, and \*OOH intermediate adsorbed at different sites.
